# Supplementary material
Source: PubMed Central journal article supplement (PMC2875115)
Supplement: NIHMS28864-supplement-2.pdf [file NIHMS28864-supplement-2.pdf]

# Supplementary Fig 1

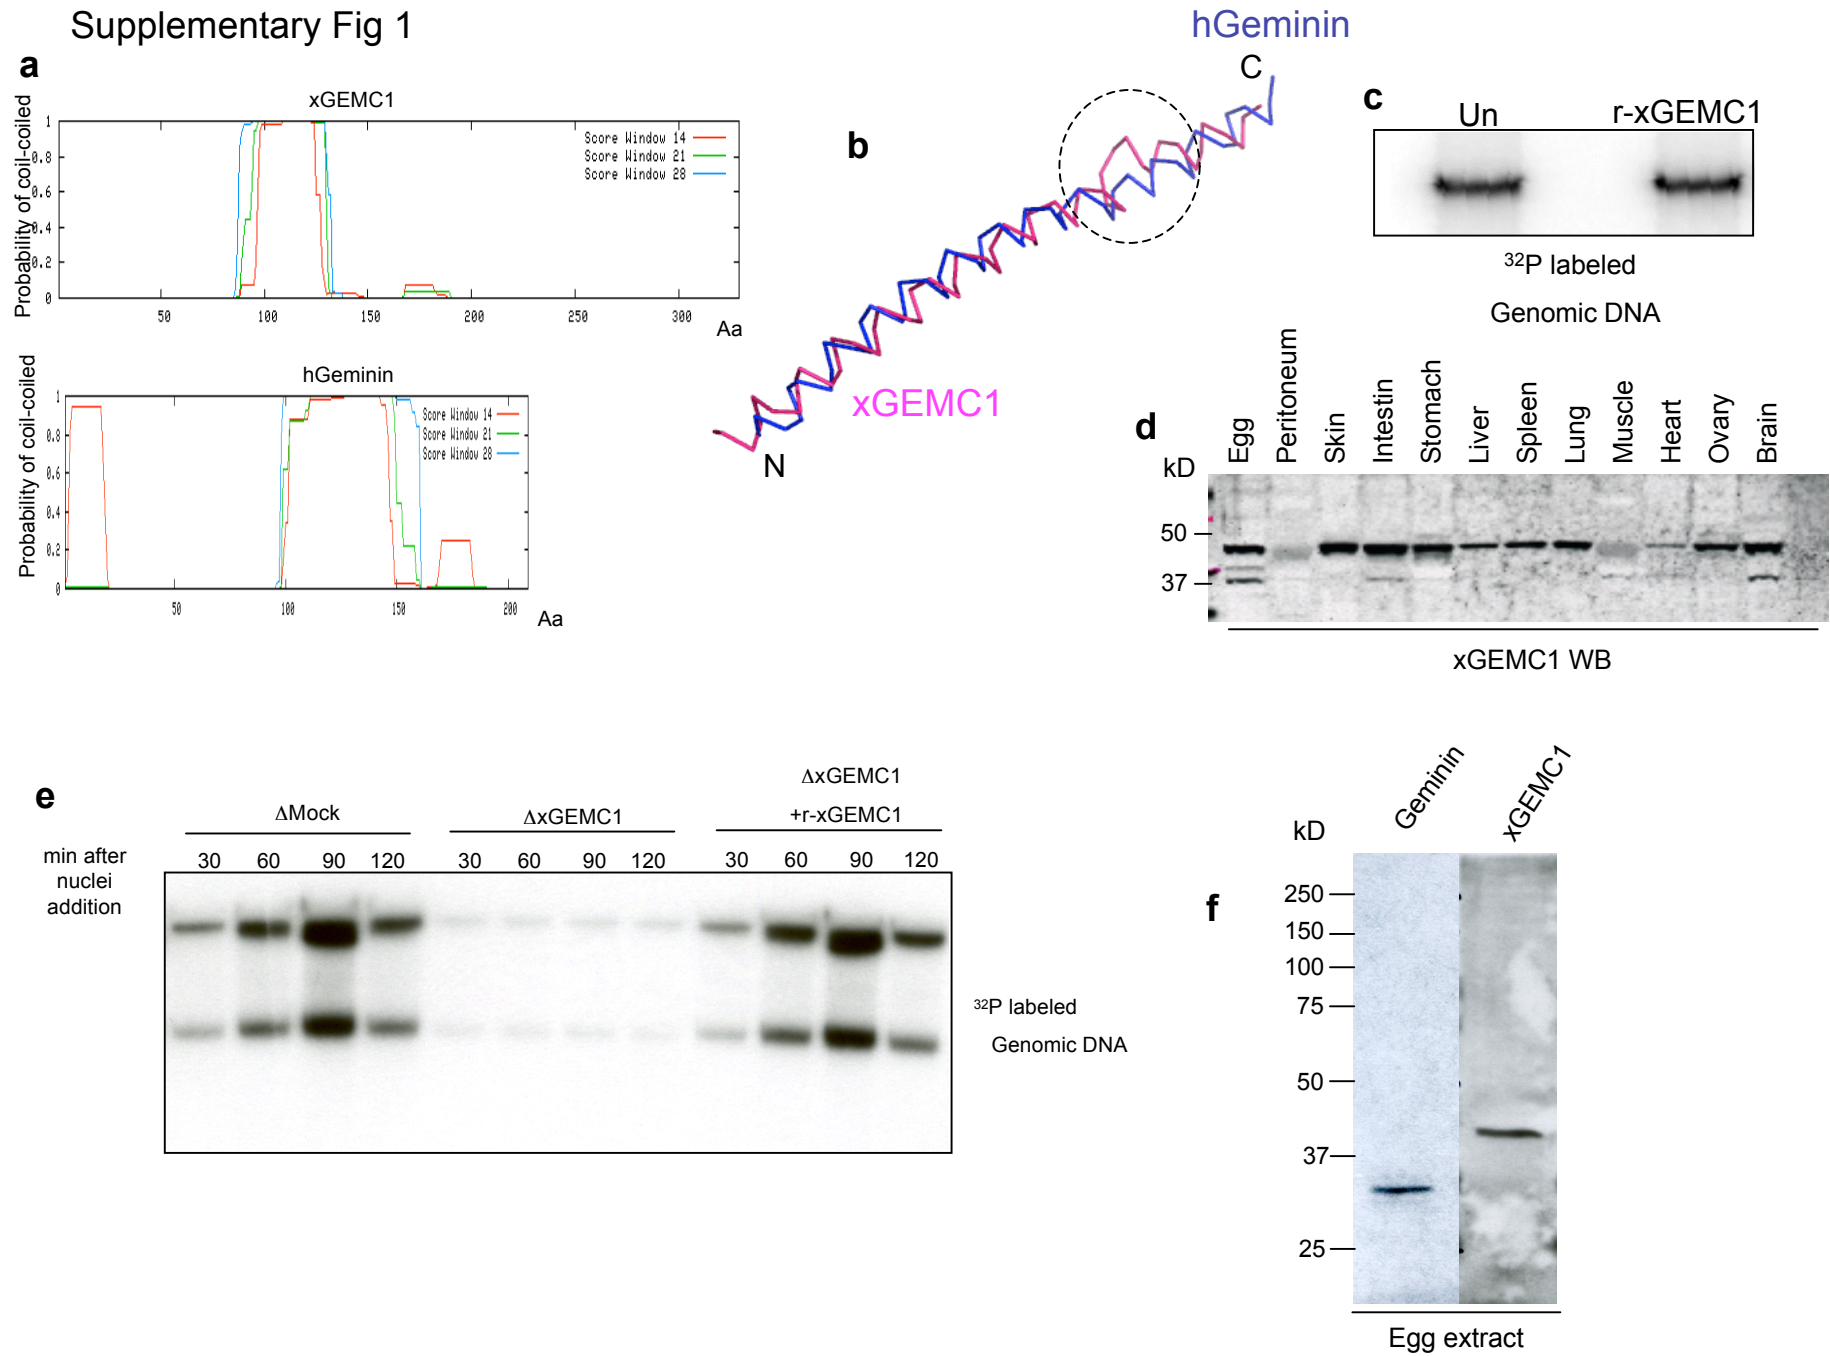

Supplementary Fig 2

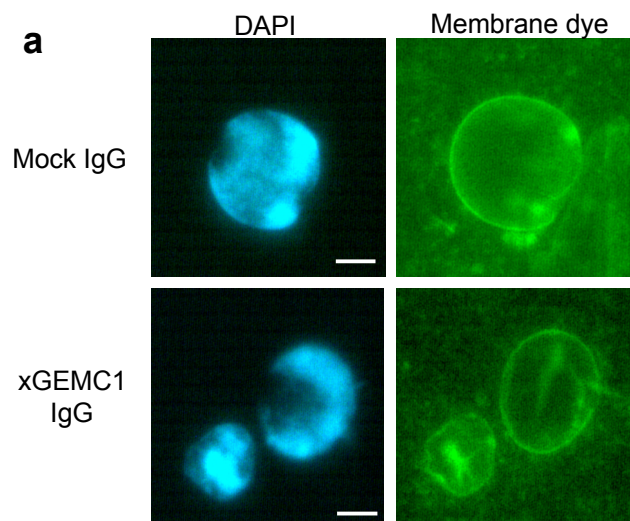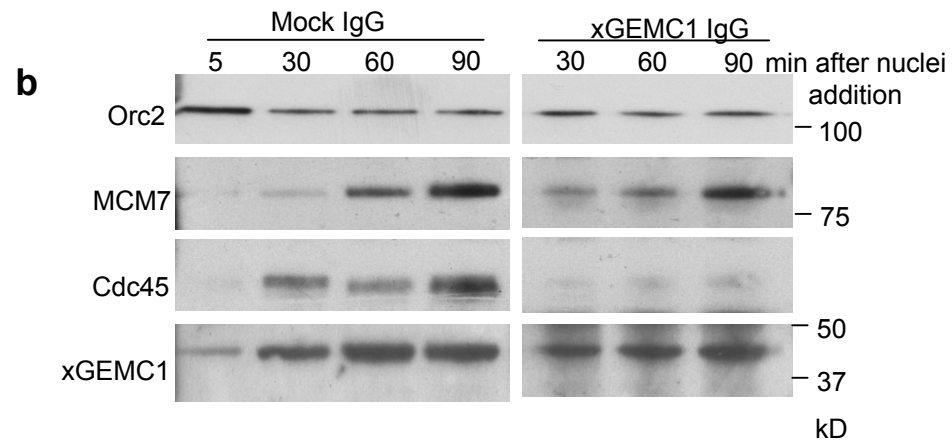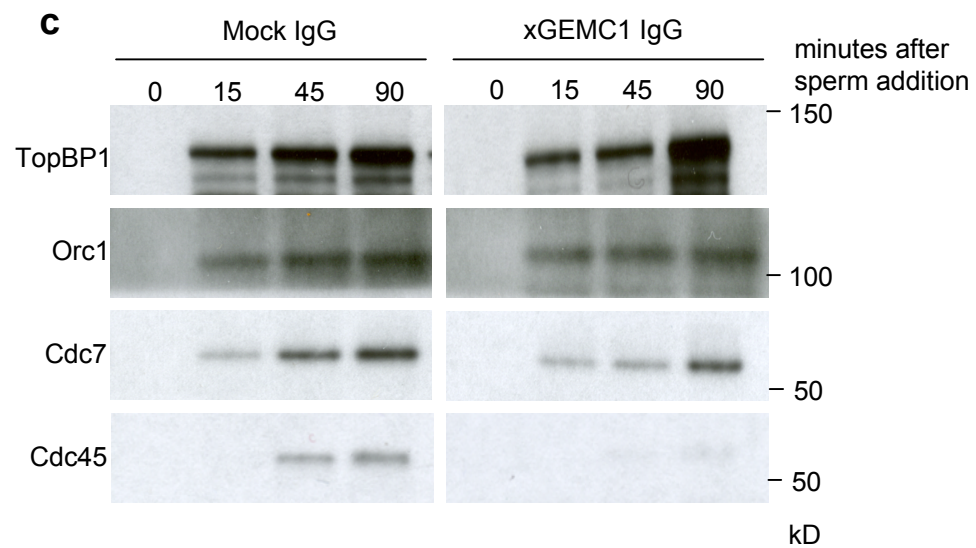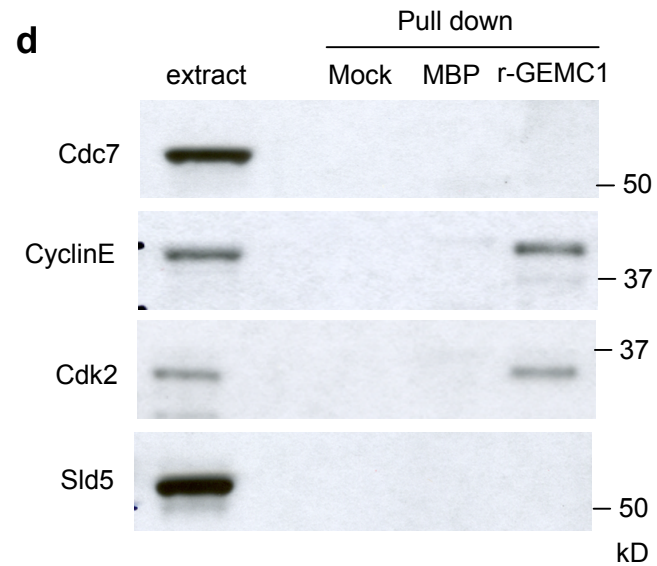

# Supplementary Fig 3

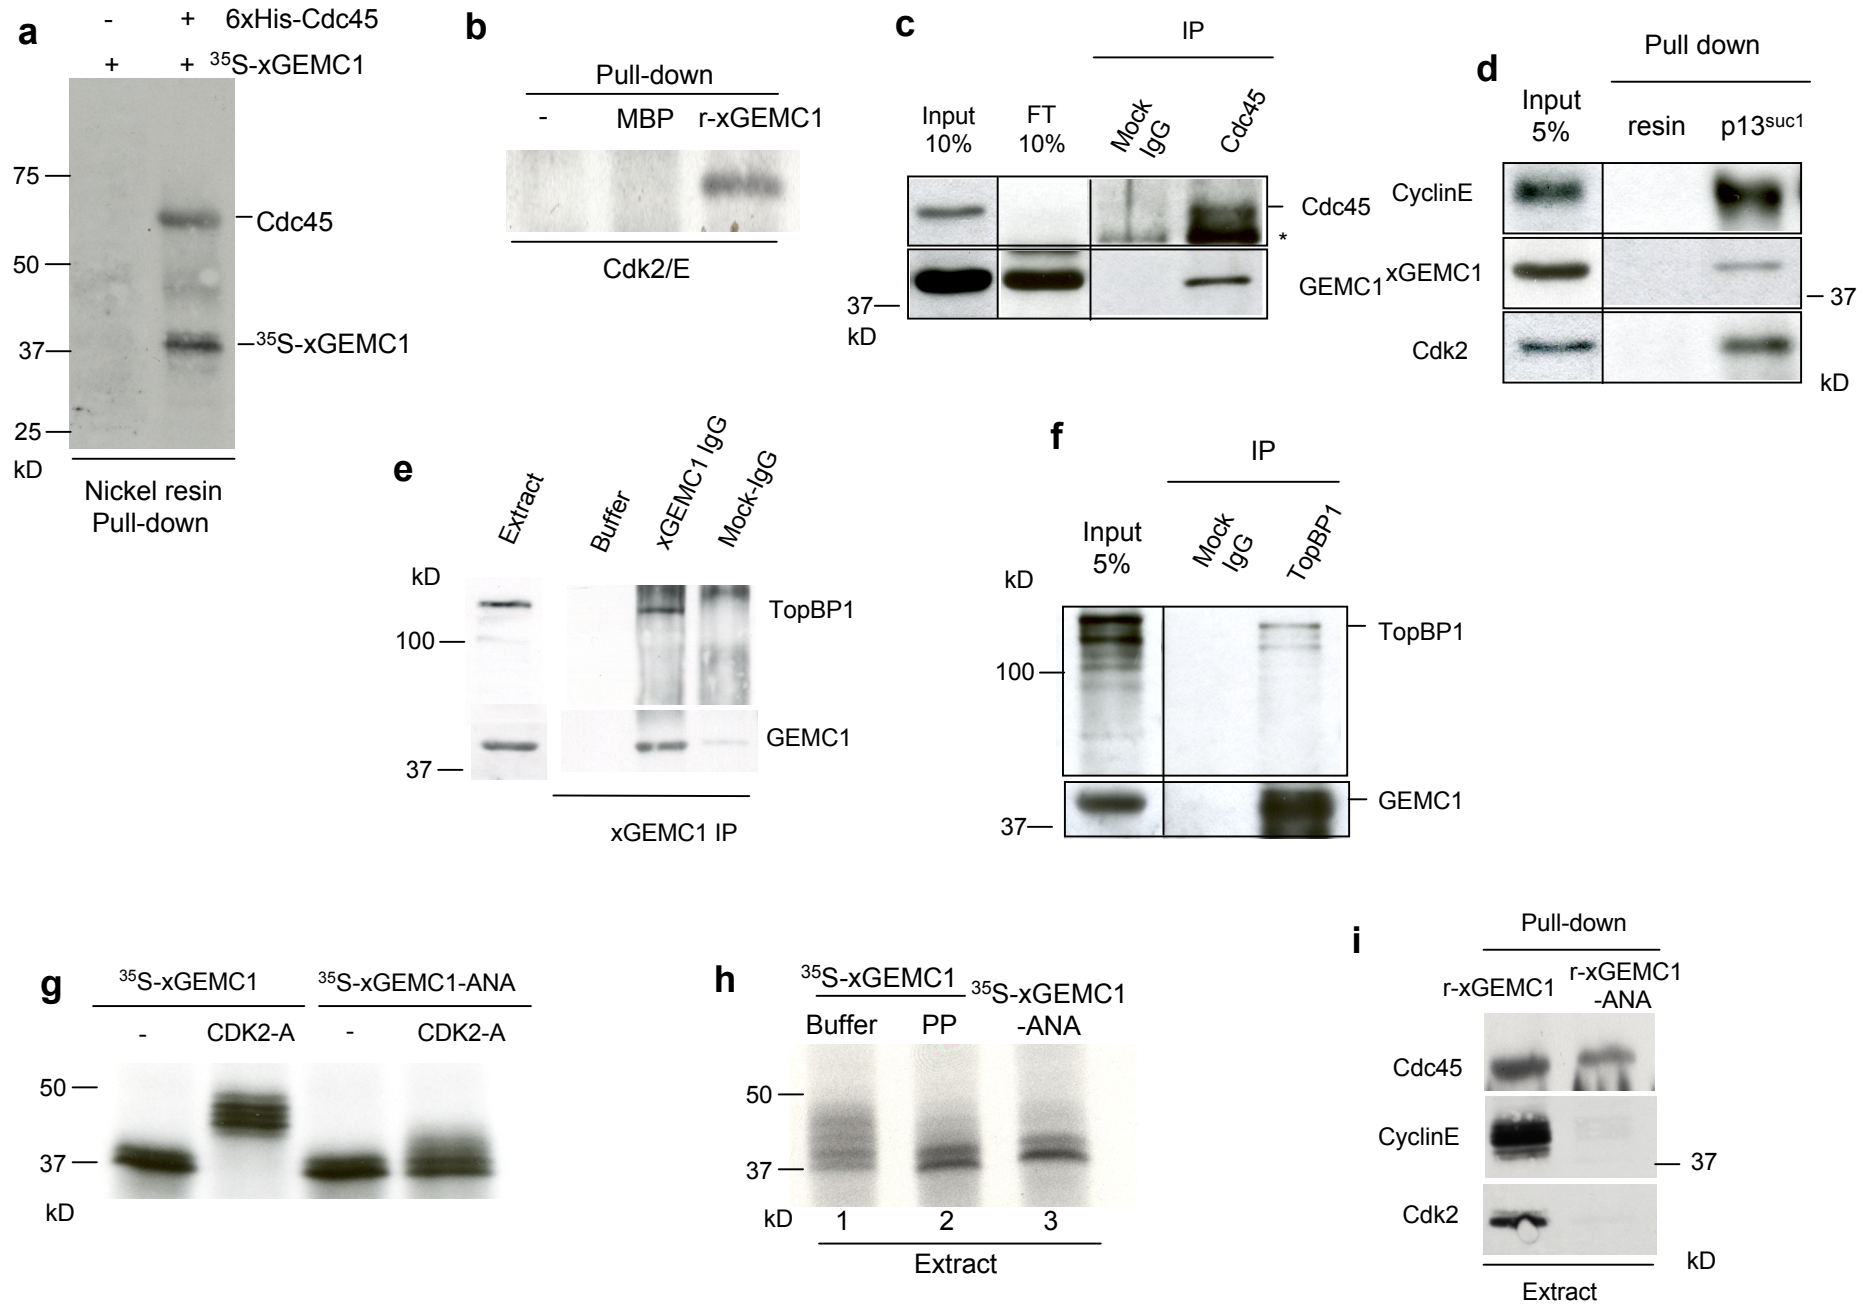

Supplementary Fig 4

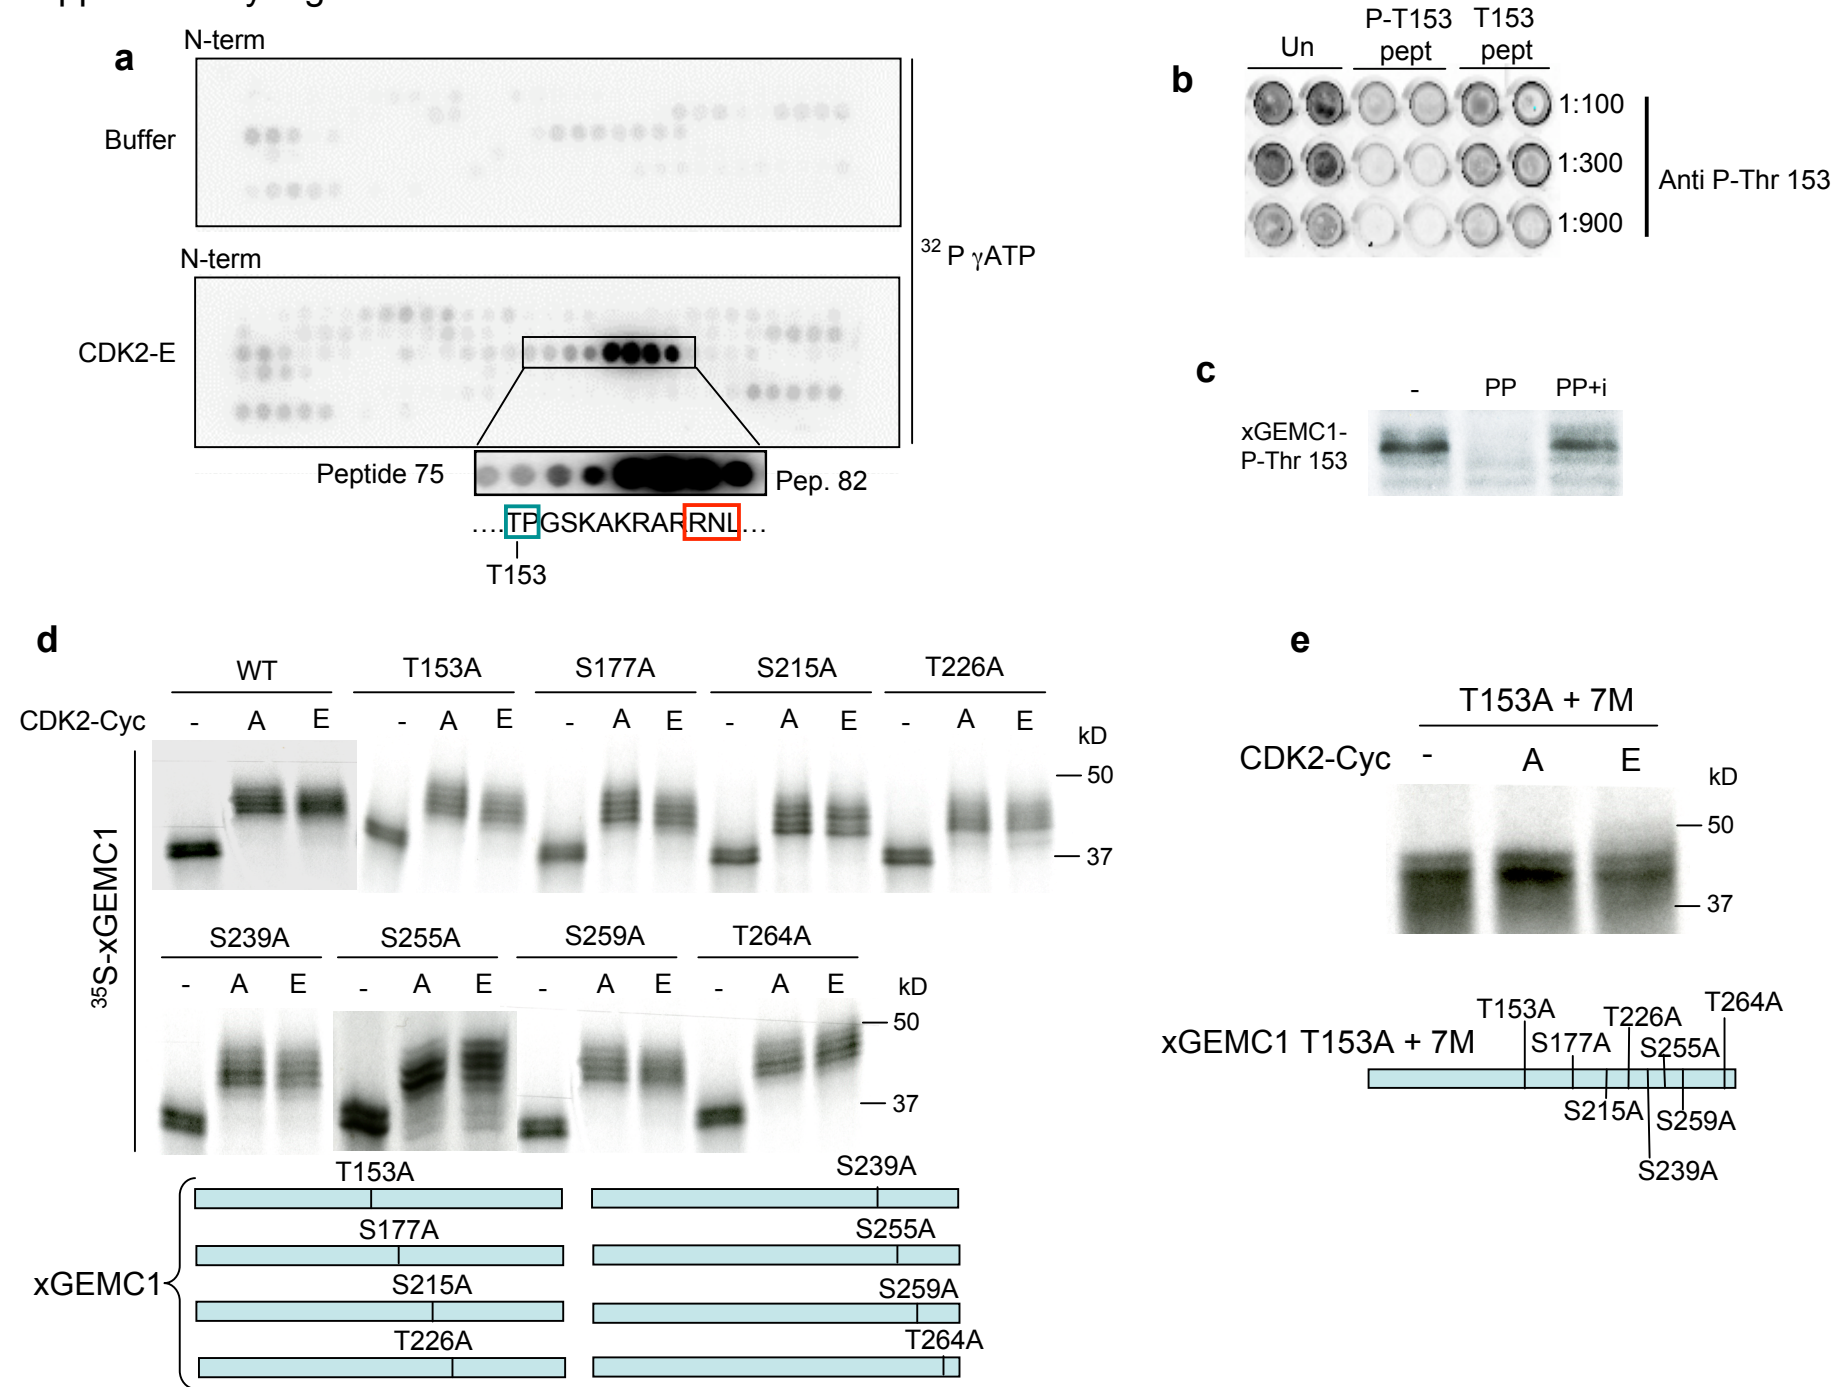

Supplementary Fig 5

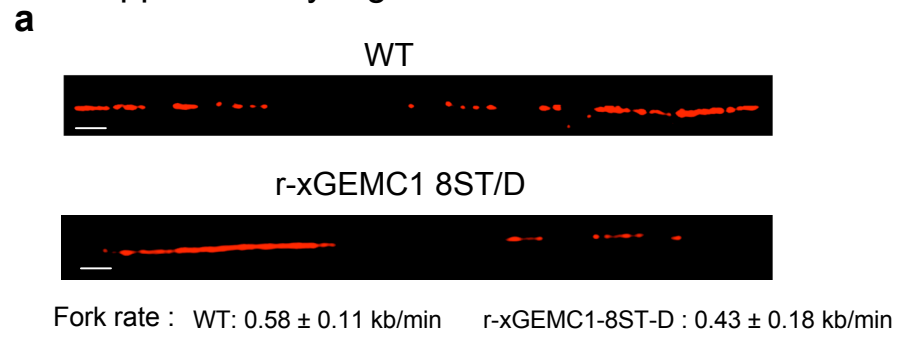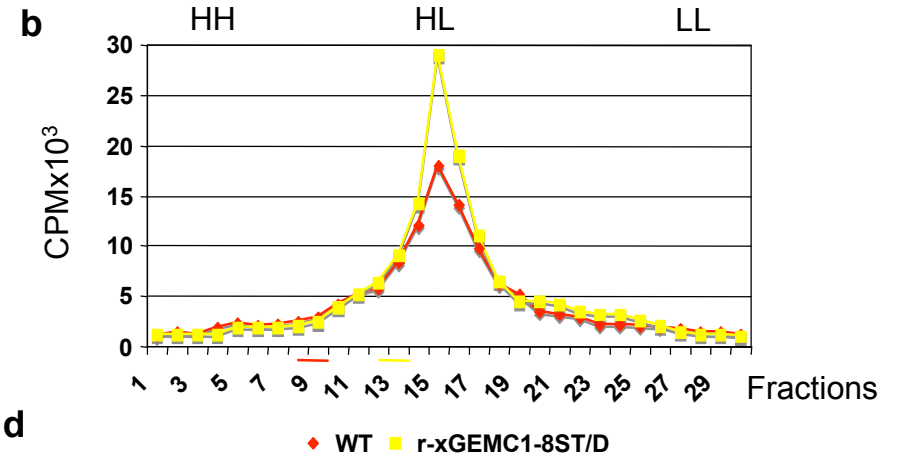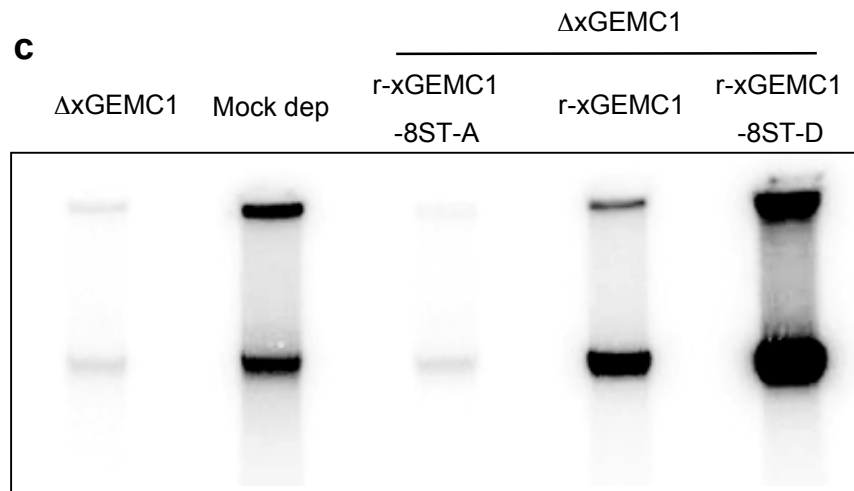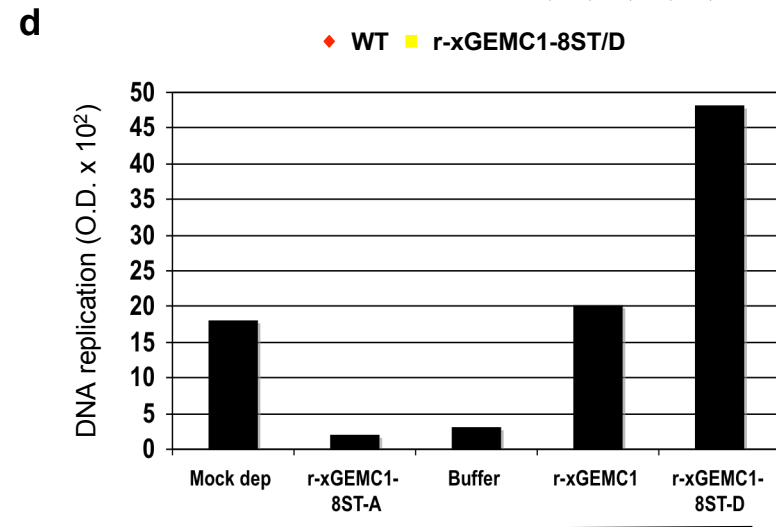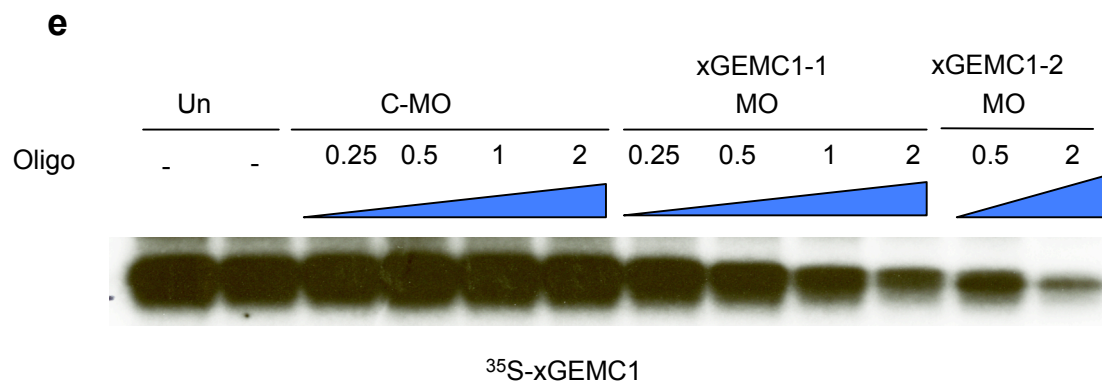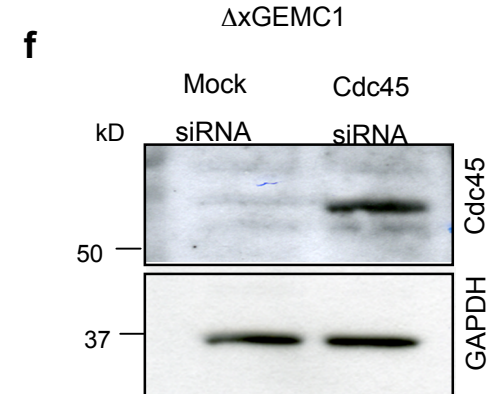

# Supplementary Fig 6

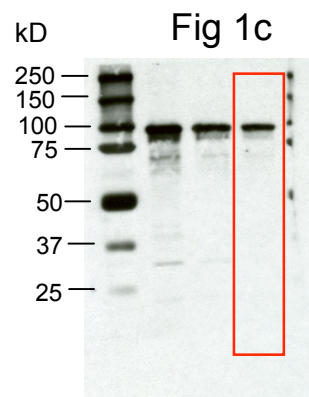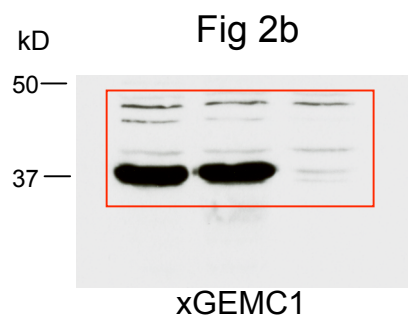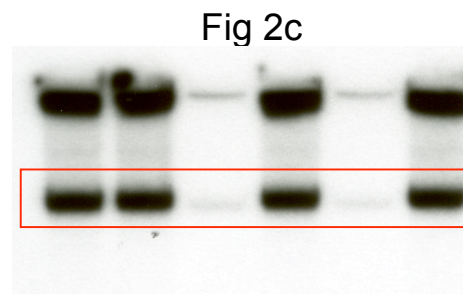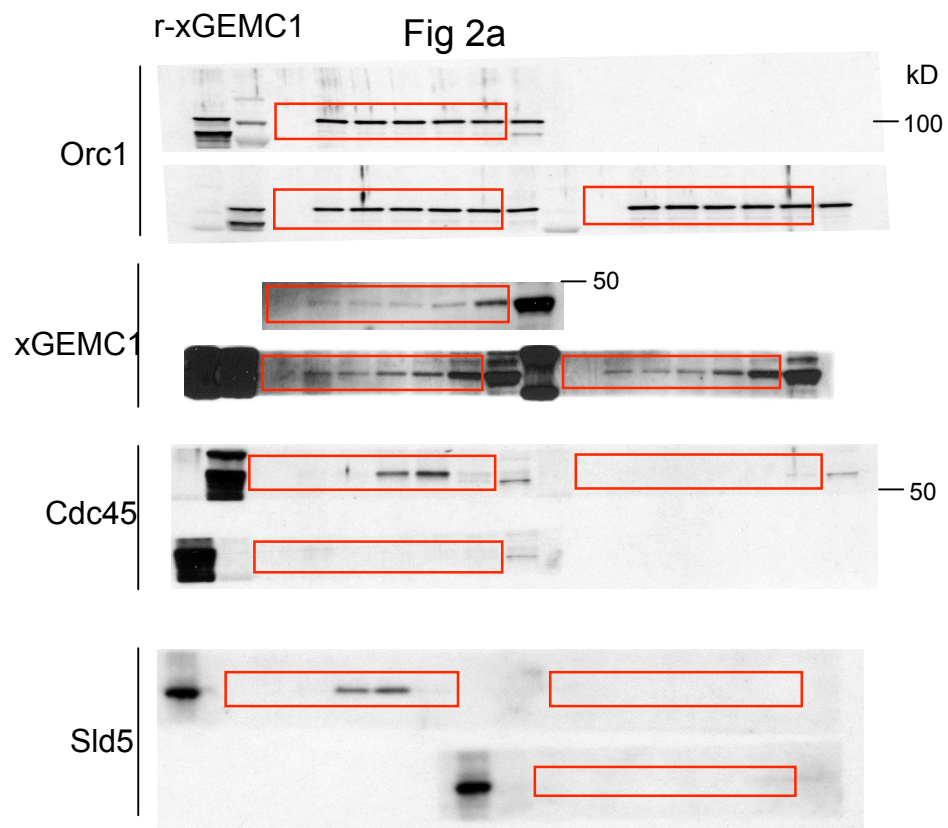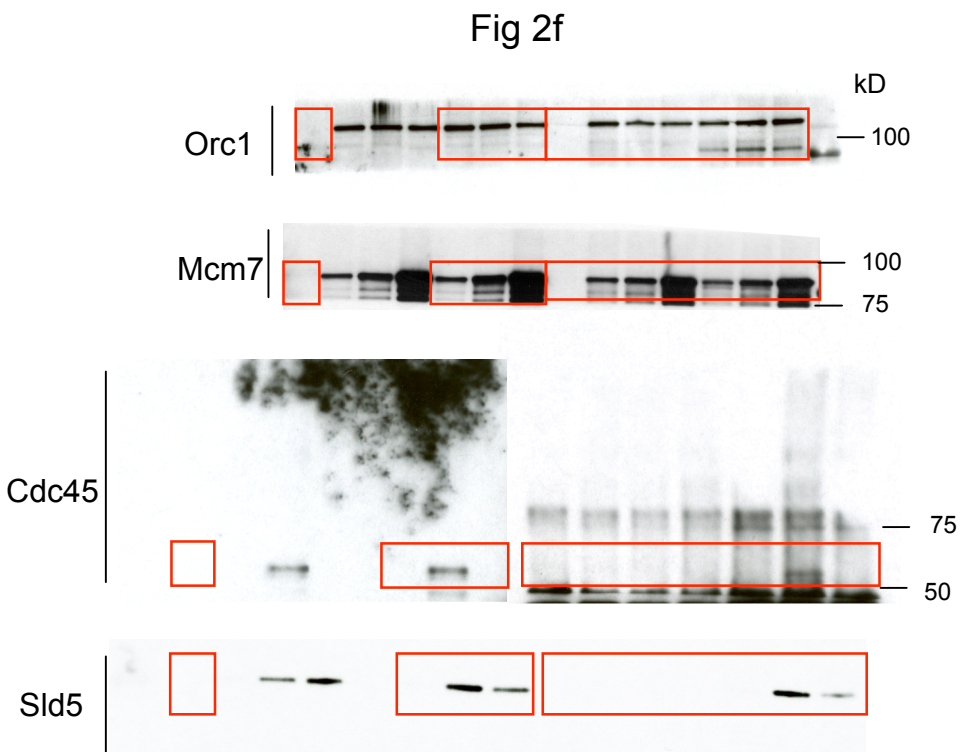

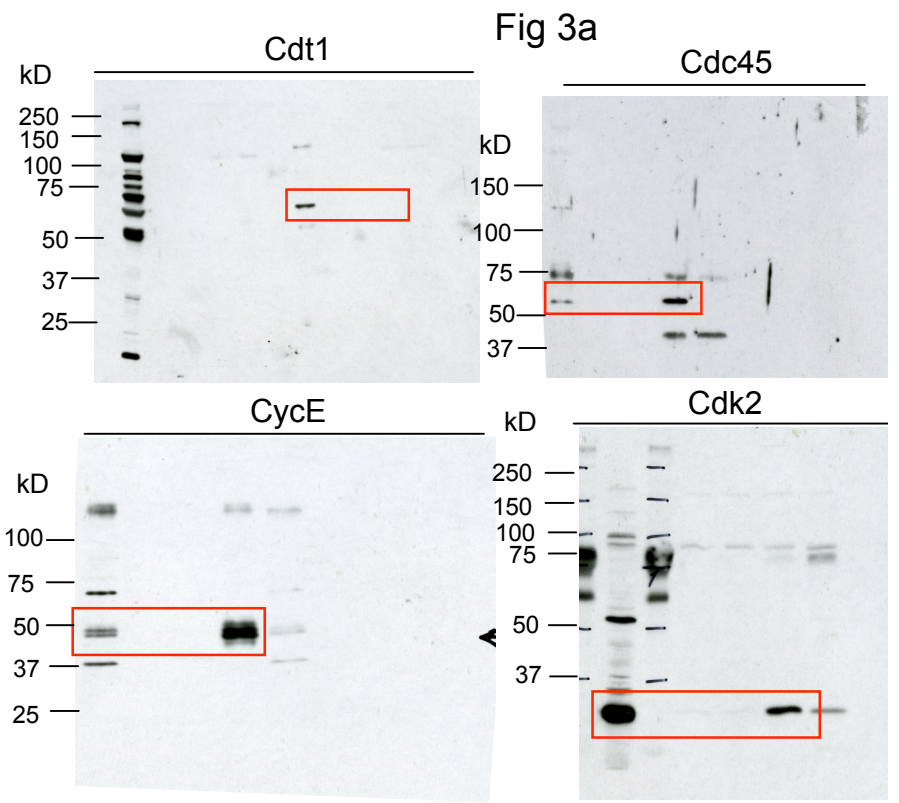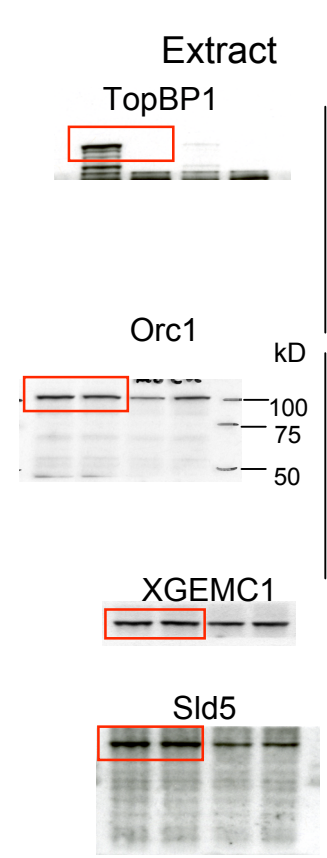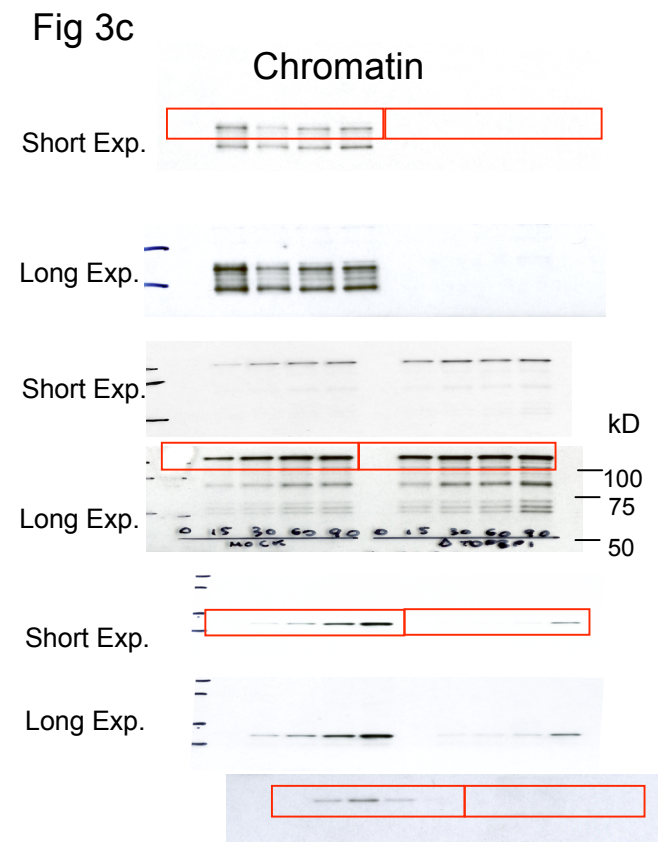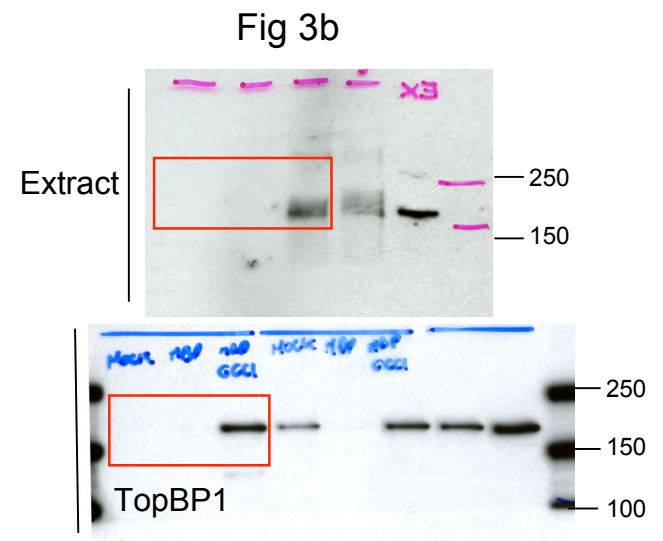

Continue

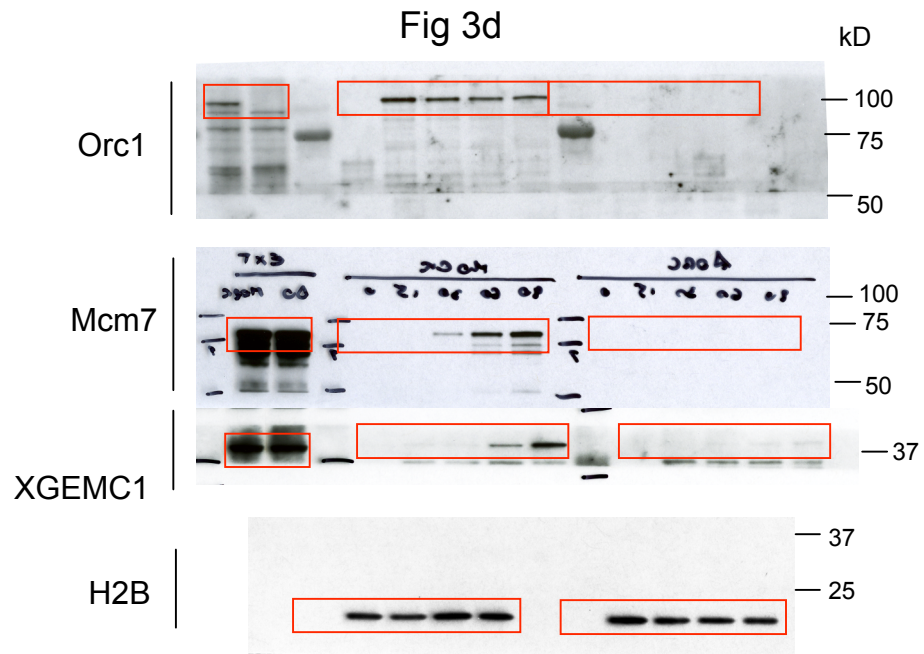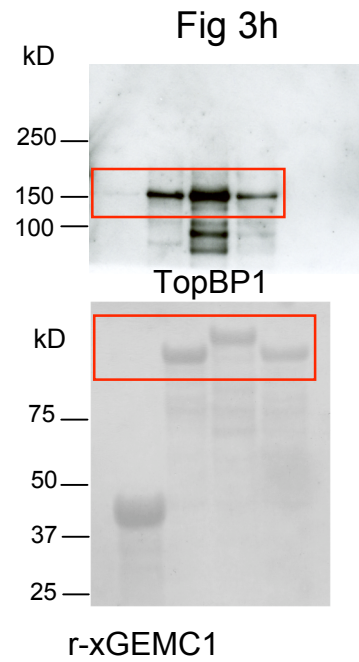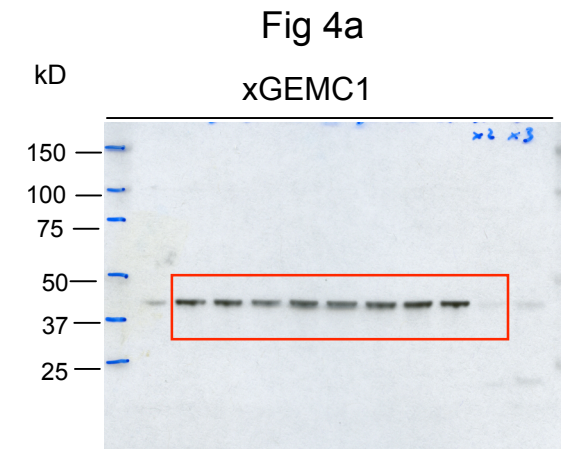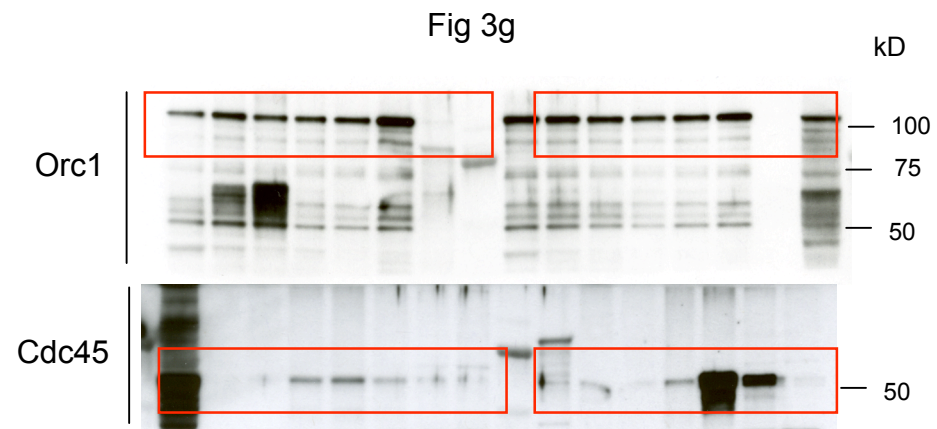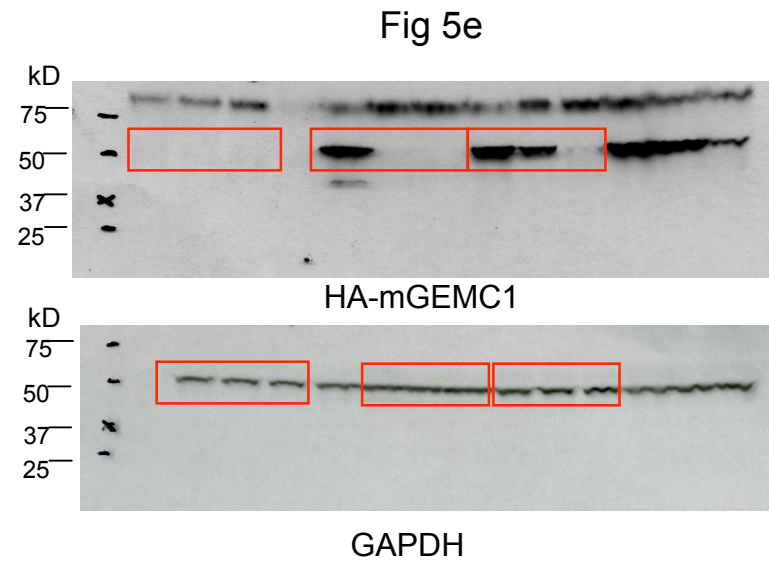

Continue



Supp Fig 1d

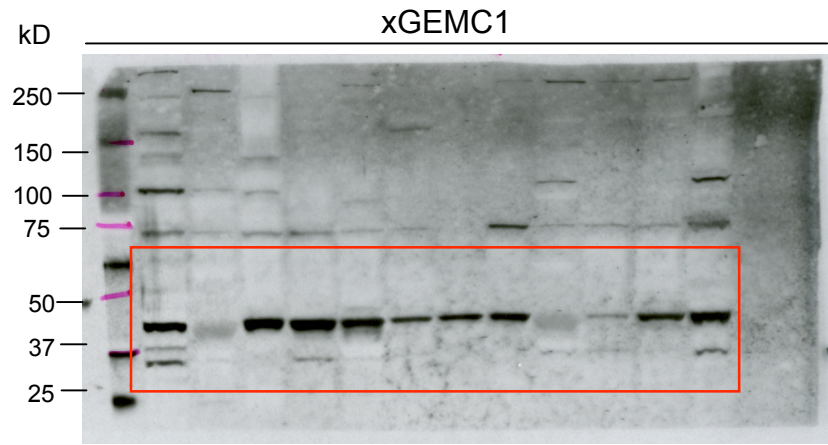

Sup Fig 2b

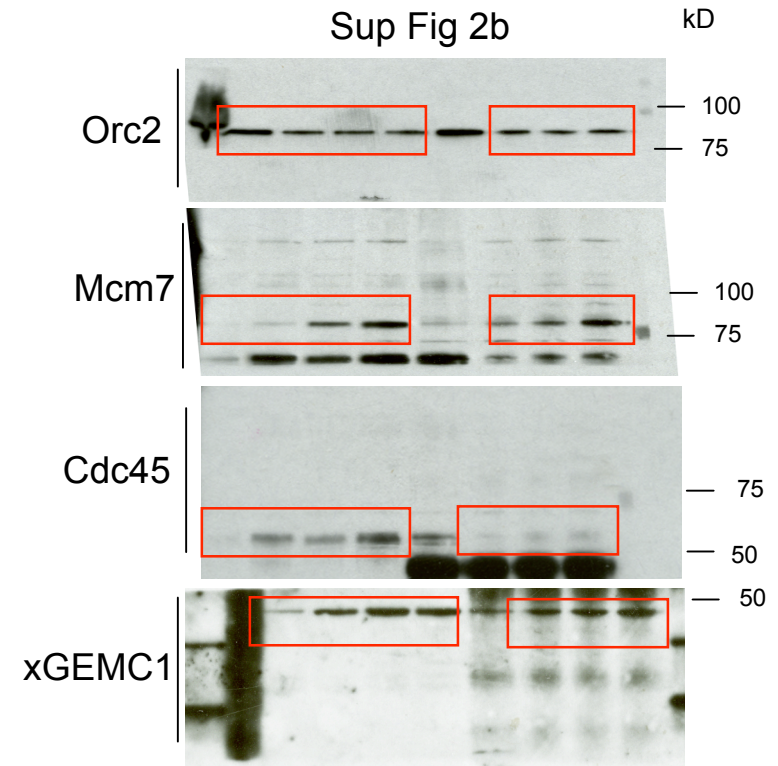

Sup Fig 2c

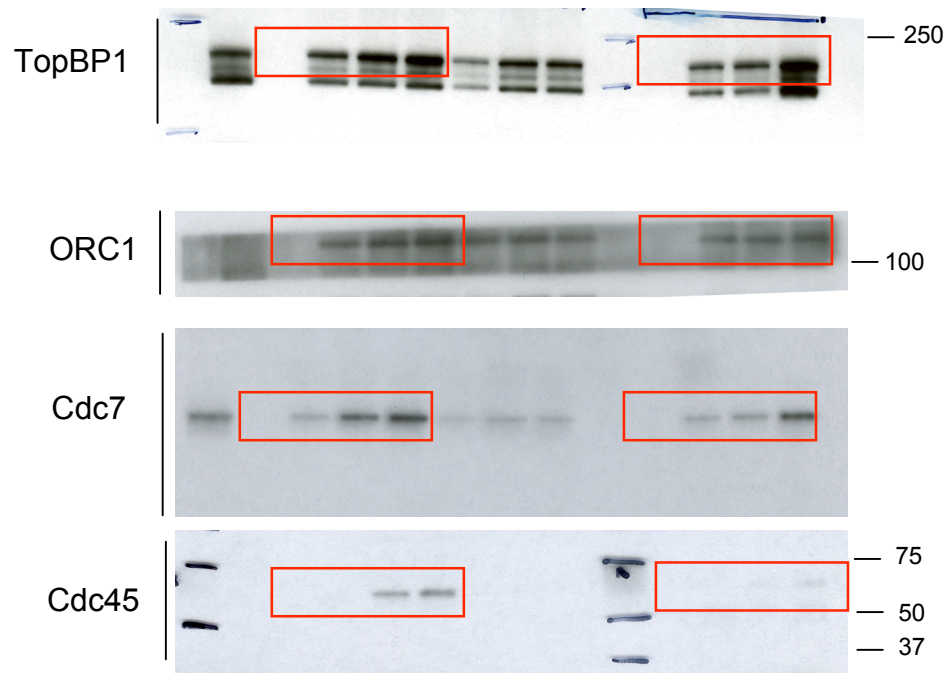

Sup Fig 2d

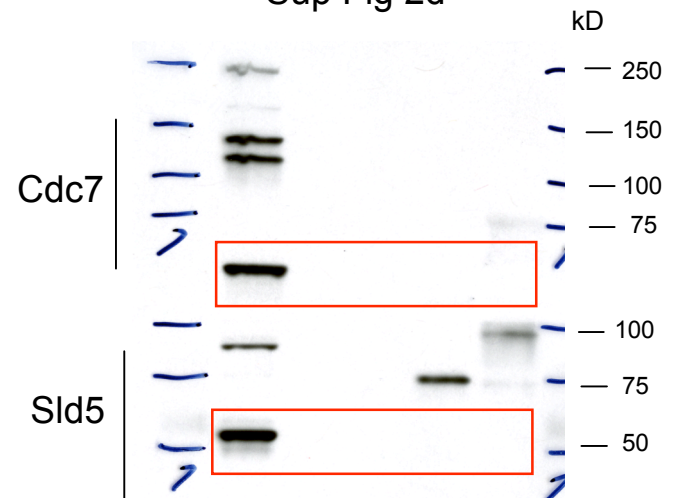

Continue

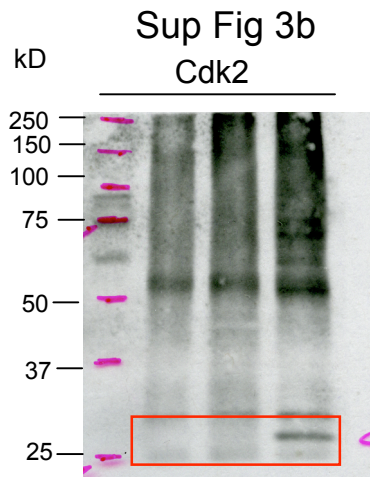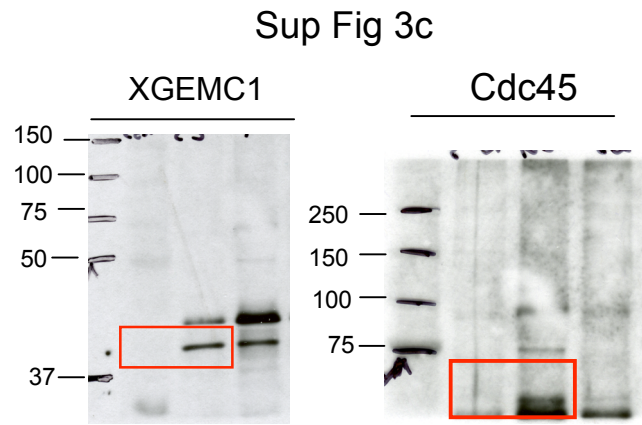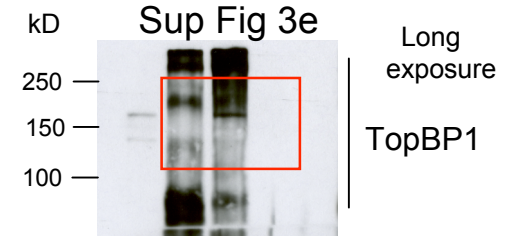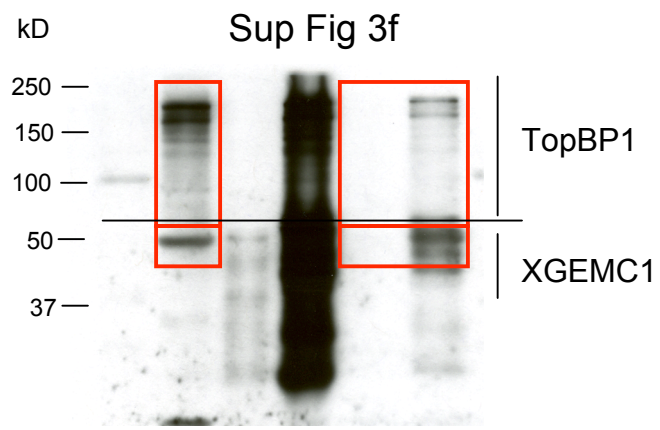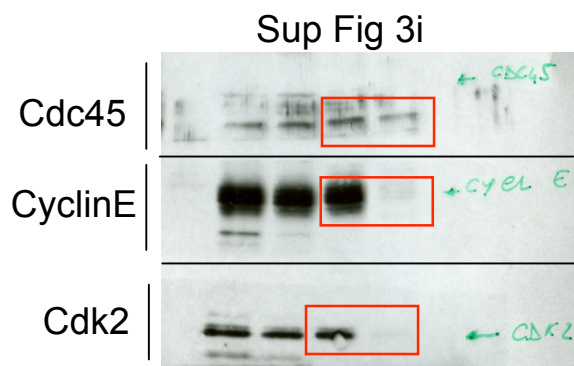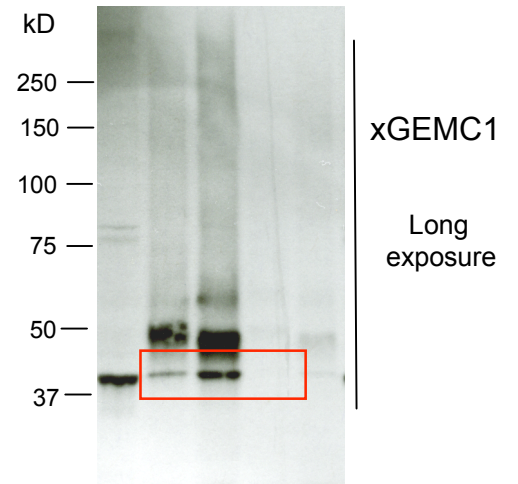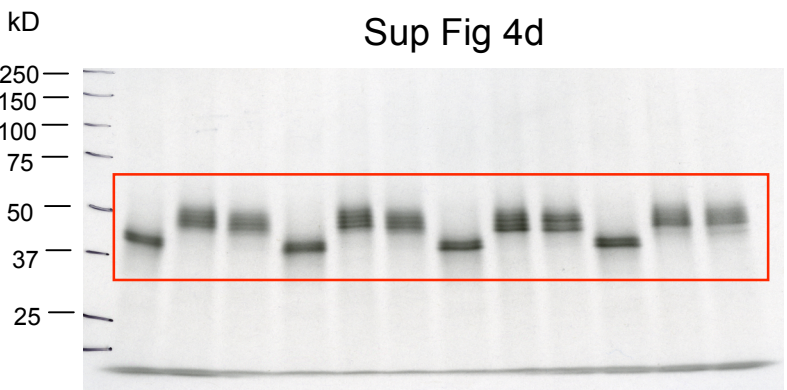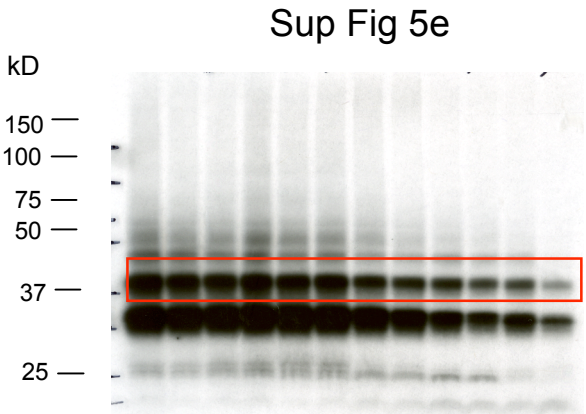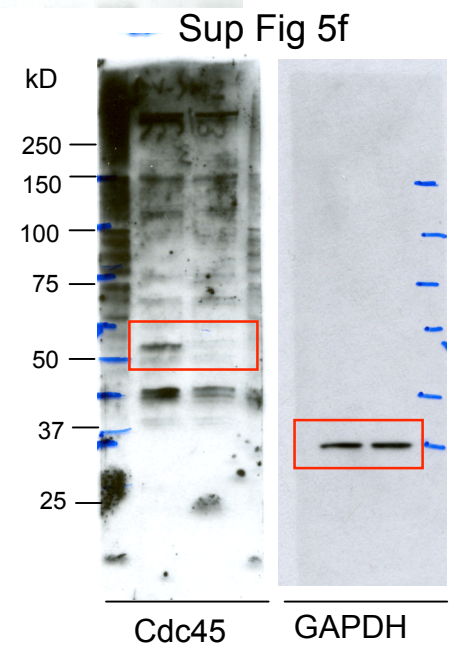

Continue

<sup>35</sup>S-XGEMC1

<sup>35</sup>S-XGEMC1

Cdc45

GAPDH
